# Supplementary figures and images for: Root Transcriptomic Analysis Reveals Global Changes Induced by Systemic Infection of Solanum lycopersicum with Mild and Severe Variants of Potato Spindle Tuber Viroid
Source: MDPI journal article supplement (doi:10.3390/v11110992), 2019-10-29

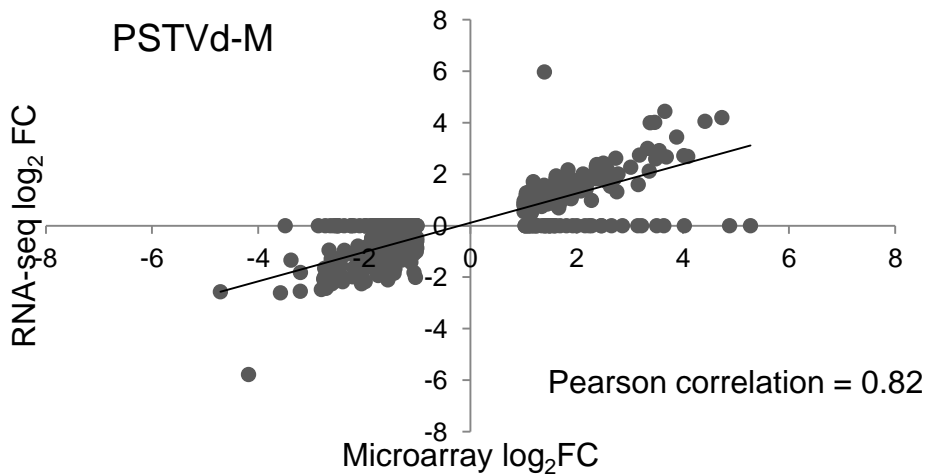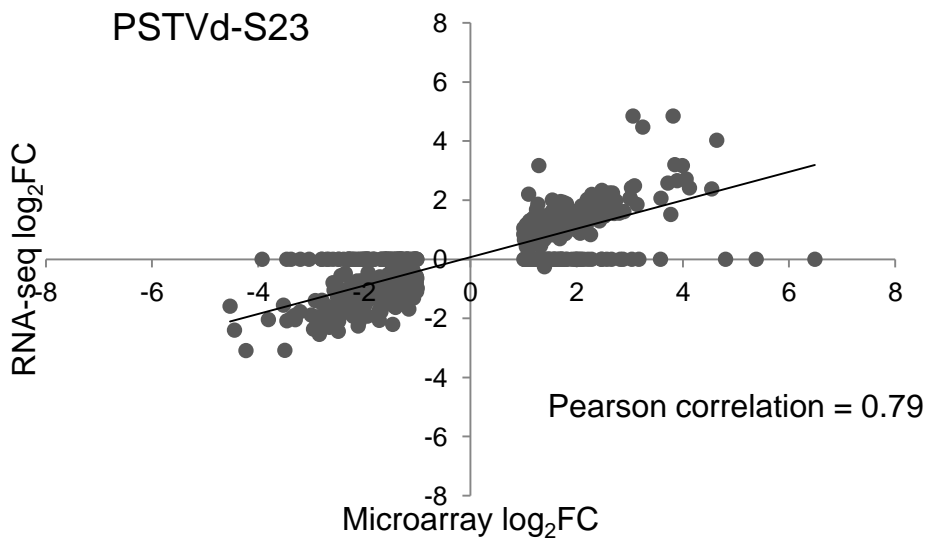

Supplement: s1 [file s1]
